# Supplementary material
Source: publisher site journal article supplement (https://www.dovepress.com/article/577261)

**Supplementary Material 1:** **Material and methods**

***Materials***

The following polymers were purchased from the respective suppliers: HPMC E5 (catalog number: S14173), HPMC E15 (catalog number: 391290000), HPMC E30 (catalog number: 20747936W0), HPMC E50(catalog number: 20747938W0), Beijing Lanbolant Trading Co., Ltd. PVP K30(catalog number: 620435-0250), Shandong Yousuo Chemical Technology Co., Ltd .PVP K90(catalog number: 180717143933) Beijing Fengli Jingqiu Pharmaceutical Co., Ltd. PEG 4000 (catalog number: 817006), PEG 6000 (catalog number: 807491), Wuxi Yatai United Chemical Co., Ltd.

***Carrier screening***

**Preparation of Dio binary solid dispersions (Dio-SDs)**

The Dio was precisely weighed and mixed with different carriers at a Dio-to-carrier ratio of 1:9, including PEG 2000, PEG 4000, PEG 6000, PVP VA64, Poloxamer 188 (P188), Poloxamer 407 (P407), PVP K30, PVP K90, HPMC E5, HPMC E15, HPMC E30, HPMC E50, and Soluplus. The mixture was then sonicated in 1:1 v/v dichloromethane and anhydrous ethanol until complete dissolution. The solvent was removed using a rotary evaporator (55-60 °C, 45 min), and the residue was frozen at -20 °C for 30 min before it was dried in a vacuum oven overnight (60 °C, 0.22 Pa). The dried material was finely ground and passed through a 60-mesh sieve to give a white powder referred to as Dio-SDs.

**Solubility Determination of Dio-SDs**

An excess amount of Dio-SDs was added to 5 mL of deionized water in a 10 mL EP tube. The mixture was shaken in a thermostatically controlled water-bath shaker at 37 °C and 150 rpm for 48 hours. After equilibration, the samples were centrifuged at 12,000 rpm for 10 minutes using a high-speed centrifuge. The supernatant was then collected, filtered through a 0.45 μm microporous membrane. The resulting solution was analyzed on a WondaSil C18 column (4.6 mm × 150 mm, 5 μm, Shimadzu, Tokyo, Japan) using an Agilent 1260 HPLC instrument (Agilent, Shanghai, China) under the following conditions: mobile phase, 12:88 v/v water/acetonitrile; flow rate, 1.0 mL/min; column temperature, 30 °C; detection wavelength, 203 nm.

**Dissolution determination of Dio-SDs**

Under the sink condition, an appropriate amount of Dio-SDs (equivalent to 5 mg Dio) was added into 0.1% SDS (900 mL). The mixture was maintained at 37 °C with a stirring speed of 75 rpm, and aliquots (5 mL) were collected at 5, 10, 15, 30, 45, 60, 90, and 120 min. The aliquots were passed through a 0.45 μm microporous membrane filter, and 0.1% SDS kept at 37 °C was added at an equal volume (5 mL for sink condition and 2.5 mL for non-sink condition). The HPLC result analysis is the same as above.

***Calculation of*** ***Supersaturation under Non-Sink Conditions***

The supersaturation ratio (S) was calculated at each time point for Dio-TSDs under non-sink conditions using the following formula:

where Ct is the concentration of the drug at time point, and Cs is the saturation concentration. The supersaturation solubility of Dio-S-PVP-TSD and Dio-S-PEG-TSD was measured using the same method as described for the Dio-SDs formulations above. The supersaturation profiles were then used to characterize the supersaturation behavior of the two TSD formulations under non-sink conditions. To summarize overall supersaturation maintenance over time, the area under the supersaturation-time curve (AUC) was calculated as a descriptive metric. Supersaturation profiles together with AUC values were presented descriptively to compare the supersaturation-maintaining ability of the two TSD formulations.

**Results and discussion**

***Carrier screening***

**Solubility and dissolution Determination of Dio-SDs**

Table S1 shows that, compared with the raw drug, the solubility of most Dio-SDs was increased. Based on the solubility data, the Dio-SD prepared with Soluplus exhibited the greatest solubilization effect, followed by those prepared with PVP VA64 and PEG 2000. As shown in Figure S1, the Dio-SD prepared using Soluplus as the carrier exhibited the most pronounced solubilization effect, with a cumulative dissolution percentage of 73.33% at 120 min, which was markedly higher than those of the other carrier materials. In addition, Dio-SDs prepared with HPMC E15, HPMC E5, PVP VA64, and PEG 2000 also demonstrated notable solubilization performance, achieving cumulative dissolution percentages of 71.80%, 67.91%, 66.41%, and 66.37%, respectively.

Based on these results, to further enhance the dissolution rate and achieve rapid drug release, Soluplus was selected as the primary carrier and combined with PVP VA64 or PEG 2000 to construct ternary solid dispersions (TSDs). By leveraging the “spring–parachute” mechanism of supersaturated solutions, this TSD-based strategy is expected to further optimize the dissolution behavior of Dio and achieve the desired rapid-release and solubilization effects. Compared to the binary Dio-SDs, the combination of Soluplus with PVP VA64 or PEG 2000 achieves a synergistic effect. Due to the complementary actions of the polymers, the ternary system provides faster dissolution and higher stability. While Soluplus alone can facilitate micelle formation, the addition of PVP VA64 or PEG 2000 further stabilizes these structures, enhancing supersaturation maintenance and improving drug release kinetics. Maintaining supersaturation is key to improving absorption and bioavailability, which is particularly important for the development of poorly soluble drugs.

***Supersaturation under Non-Sink Conditions***

**Figure S2** shows a comparison of the supersaturation between **Dio-S-PVP-TSD** and **Dio-S-PEG-TSD** under non-sink conditions. Based on a descriptive evaluation of the supersaturation profiles and AUC values, Dio-S-PEG-TSD appeared to exhibit a higher supersaturation ratio and to maintain supersaturation for a longer period than Dio-S-PVP-TSD under non-sink conditions.

Table S1: Results of Dio-SDs solubility measurement

| Parameter | Solubility (mg/mL) |
| --- | --- |
| Dio-P188 | 0.0035±0.0018 |
| Dio-P407 | 0.0085±0.0020 |
| Dio-PEG 2000 | 0.0190±0.0109 |
| Dio-PEG 4000 | 0.0047±0.0004 |
| Dio-PEG 6000 | 0.0060±0.0001 |
| Dio-PVP VA64 | 0.0403±0.0209 |
| Dio-Soluplus | 0.1129±0.0357 |
| Dio-HPMC E5 | 0.0011±0.0003 |
| Dio-HPMC E15 | 0.0010±0.0004 |
| Dio-HPMC E30 | 0.0009±0.0008 |
| Dio-HPMC E50 | 0.0006±0.0003 |
| Dio-PVP K90  Dio-PVP K30 | 0.0087±0.0037  0.0082±0.0007 |
| Dio | 0 |

**Figure legends:**

**Figure. S1** Dio-SDs dissolution curves prepared by different carriers.


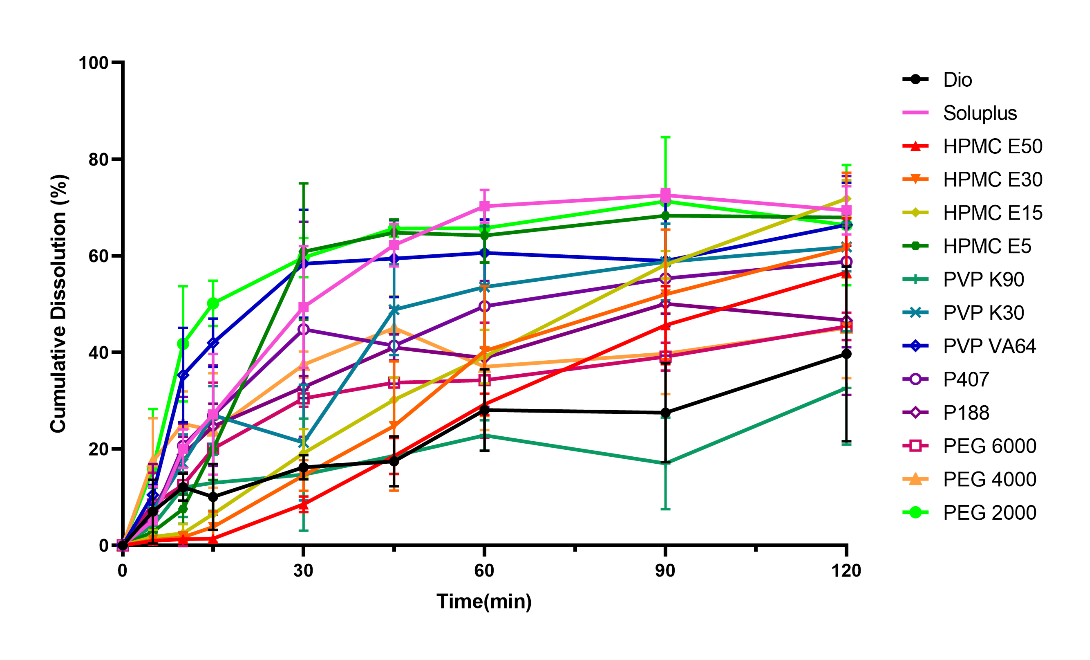


**Figure. S2** Supersaturation of Dio-S-PVP-TSD and Dio-S-PEG-TSD under non-sink conditions.


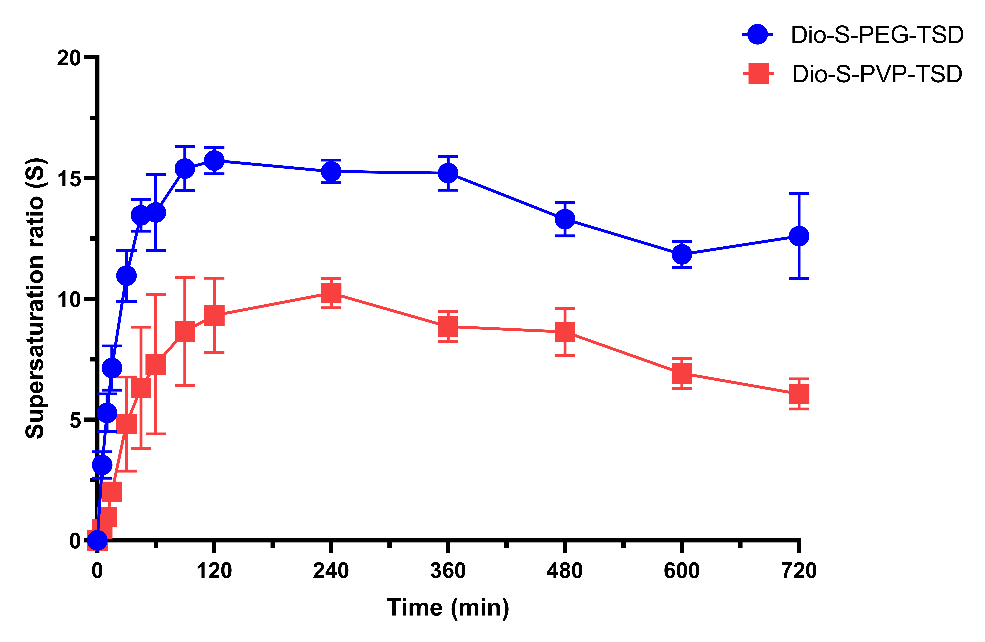


**Figure. S3** Normal Q-Q plots and boxplots of ln-transformed pharmacokinetic parameters. Normal Q-Q plots of ln (AUC0-t) for Dio (a), Dio-S-PVP-TSD (b), and Dio-S-PEG-TSD (c); normal Q-Q plots of ln (Cmax) for Dio (d), Dio-S-PVP-TSD (e), and Dio-S-PEG-TSD (f); and boxplots of ln (AUC0-t) (g) and ln (Cmax) (h).


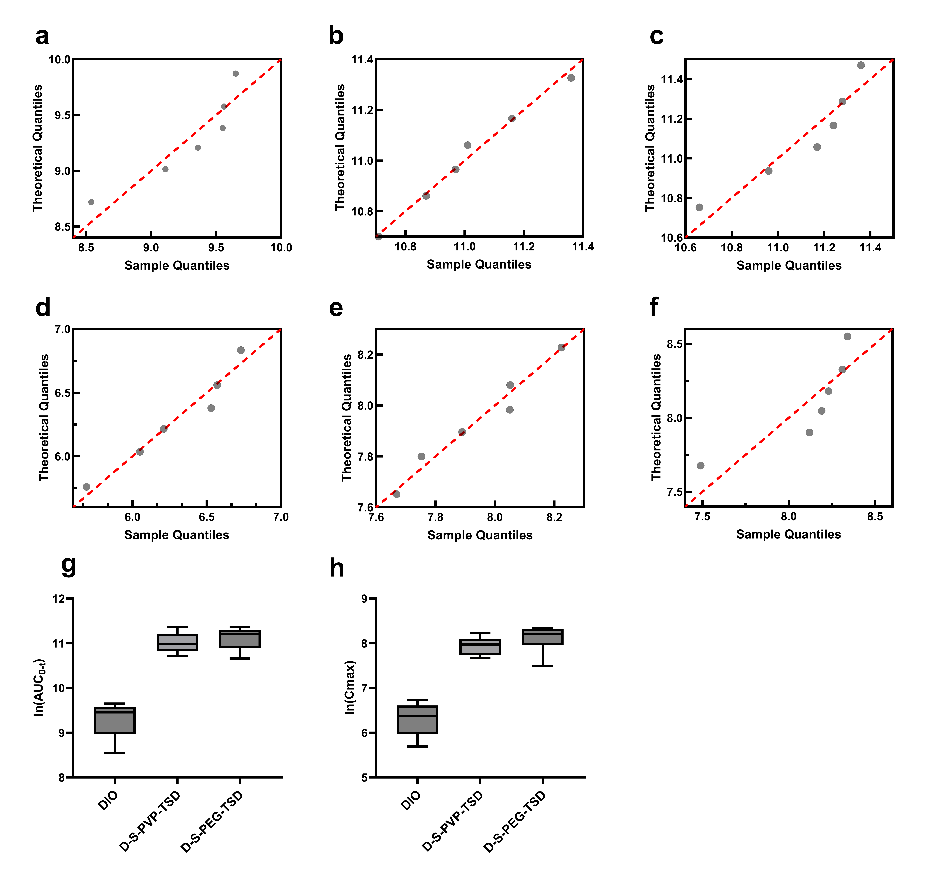

Supplement: Supplementary file 1 [file 577261%20Revised%20Supplementary%20Materials%20-%20Re-re-revised.docx]
